# Supplementary material
Source: MDPI journal article supplement (https://www.mdpi.com/2076-3263/13/6/159)
Supplement: s1 [file s1]

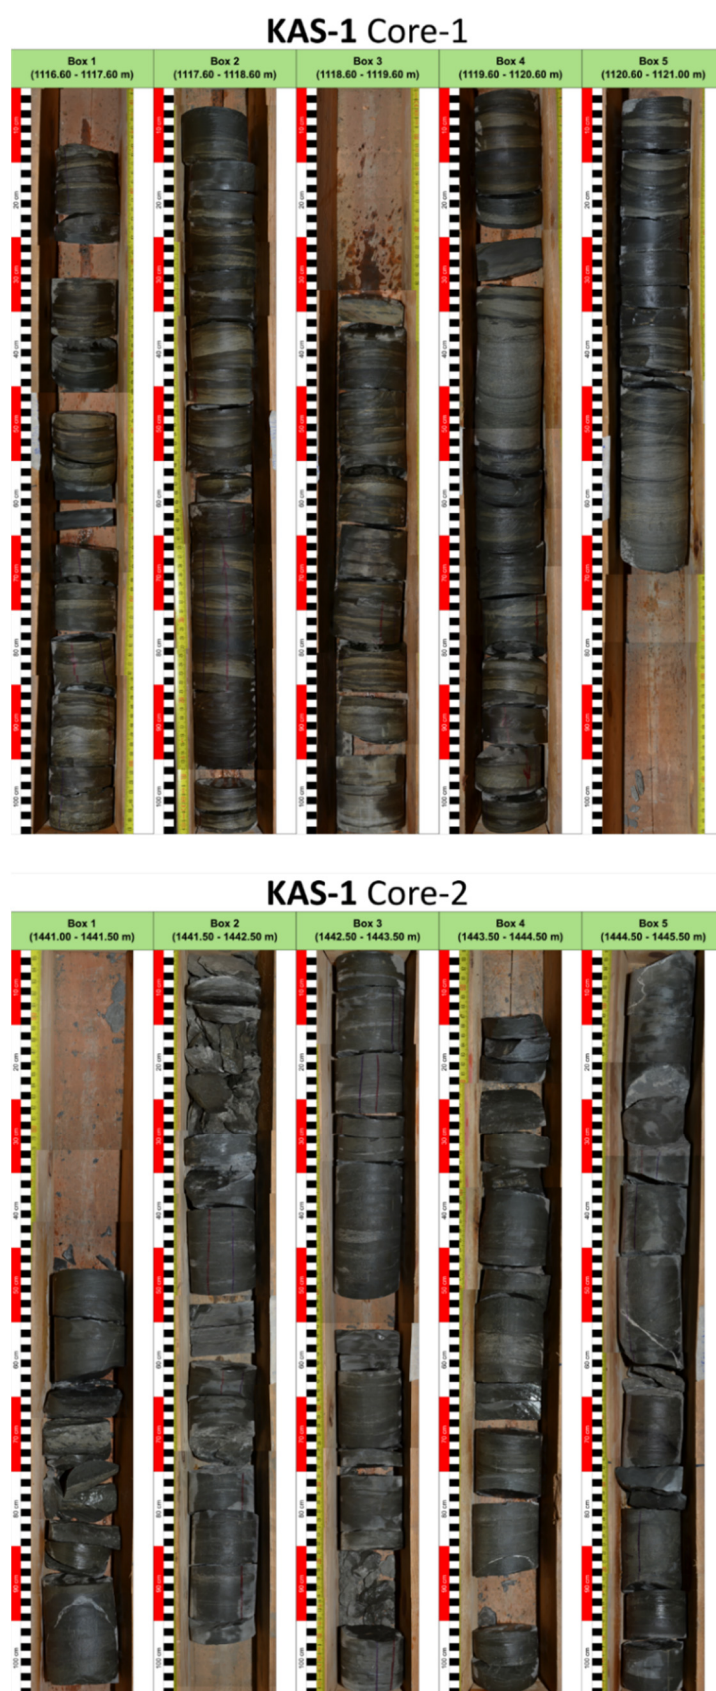

**Figure S1.** Core photographs from KAS-1 well (#C-1 and #C-2).

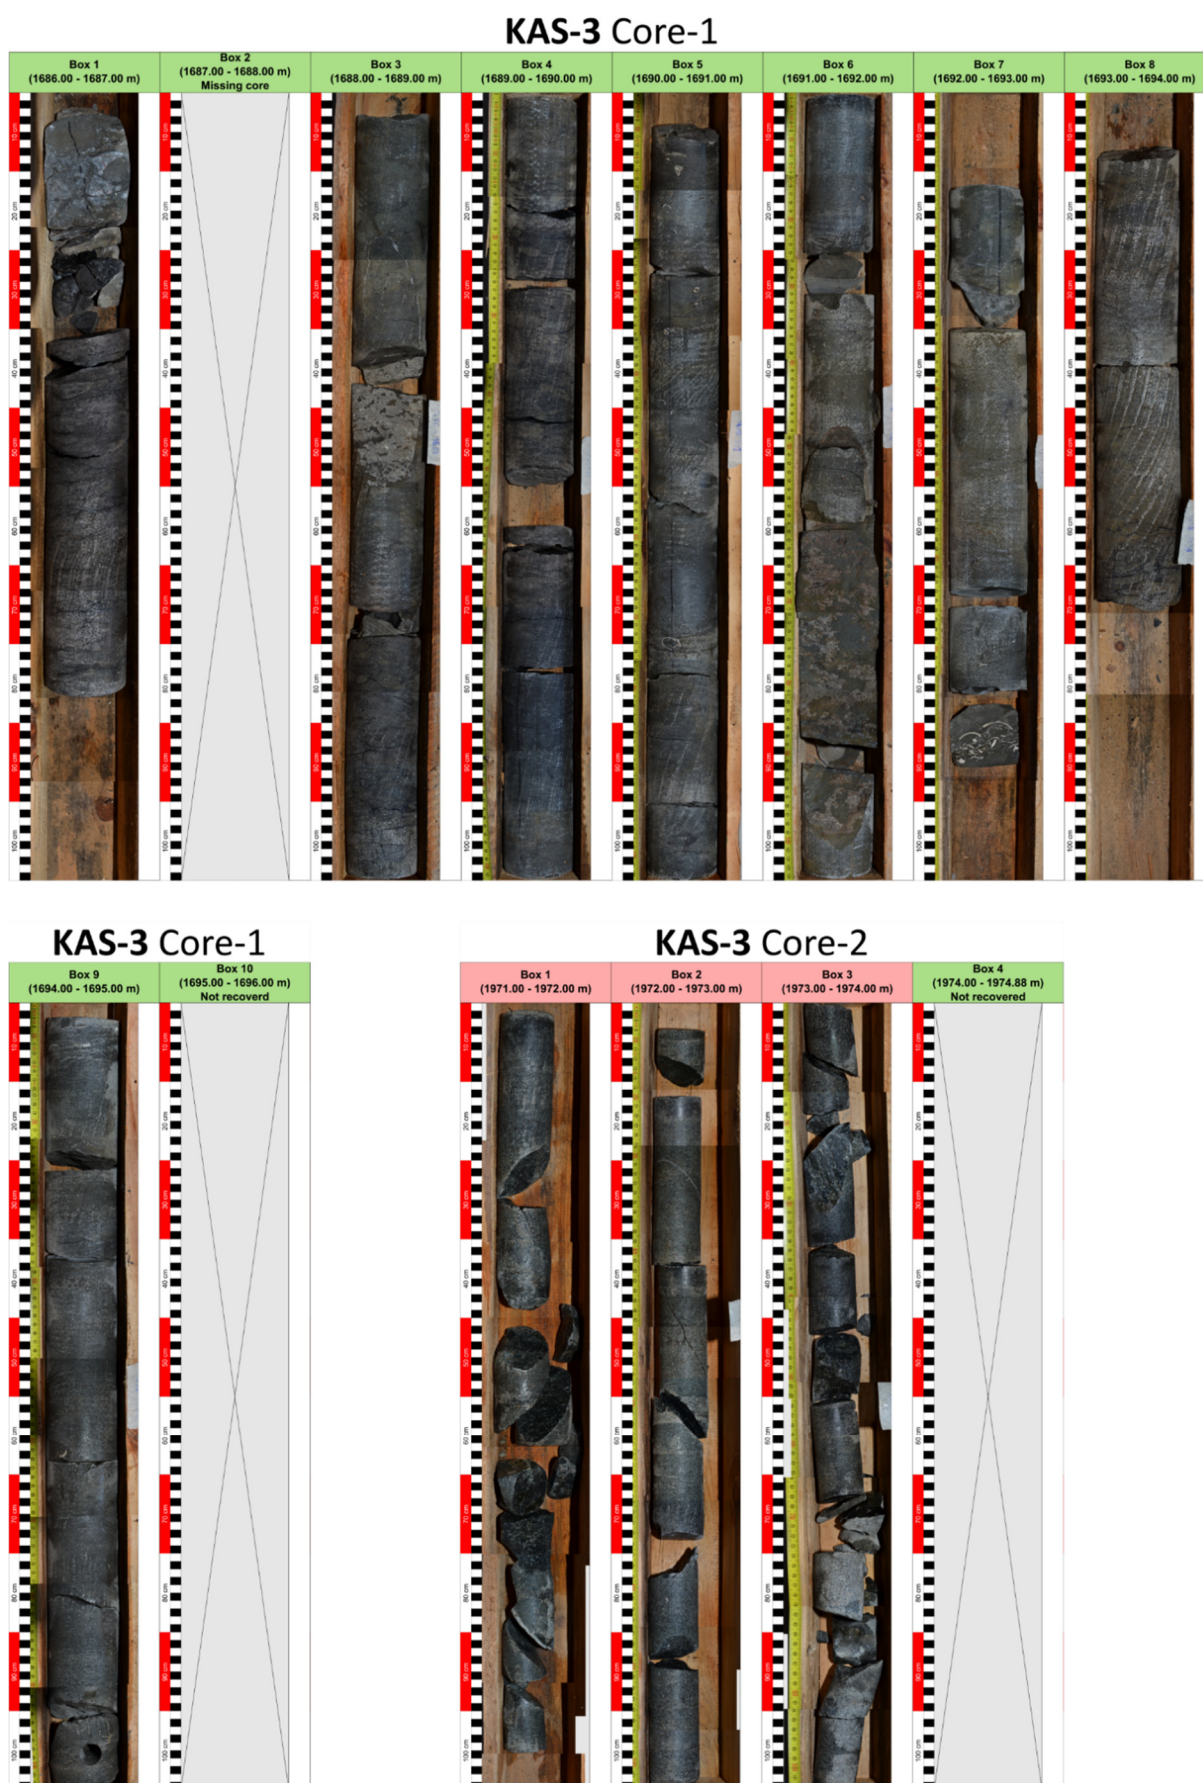

**Figure S2.** Core photographs from KAS-3 well (#C-1 and #C-2). The red colours in #B1,2 and 3 of #C-2, highlight the uncertainty for the order of the core rubbles in these boxes.



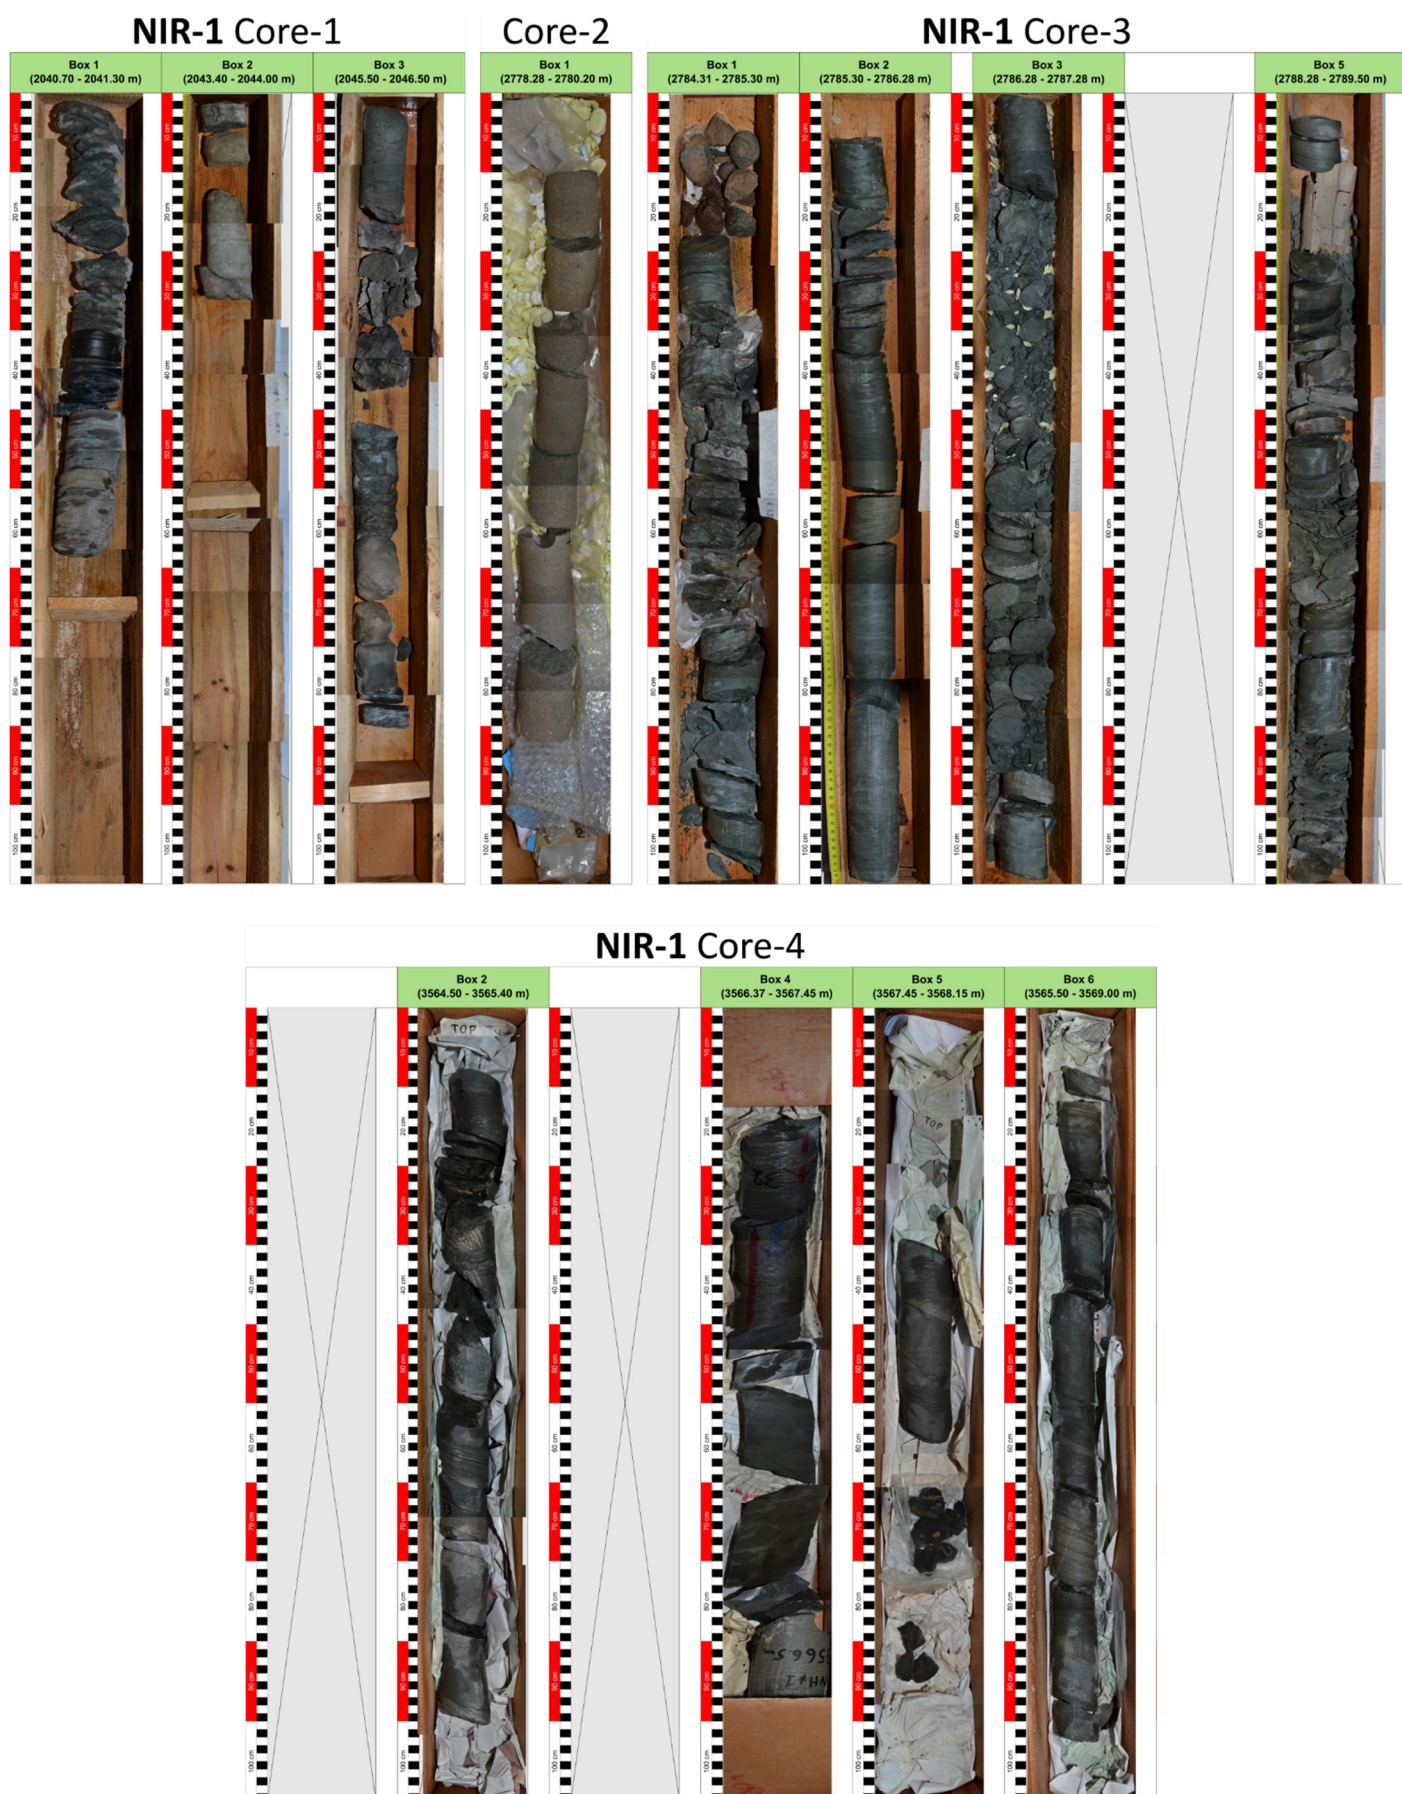

Figure S3. Core photographs from NIR-1 well (#C-1, #C-2, #C-3 and #C-4).



## PO-1 Core-1

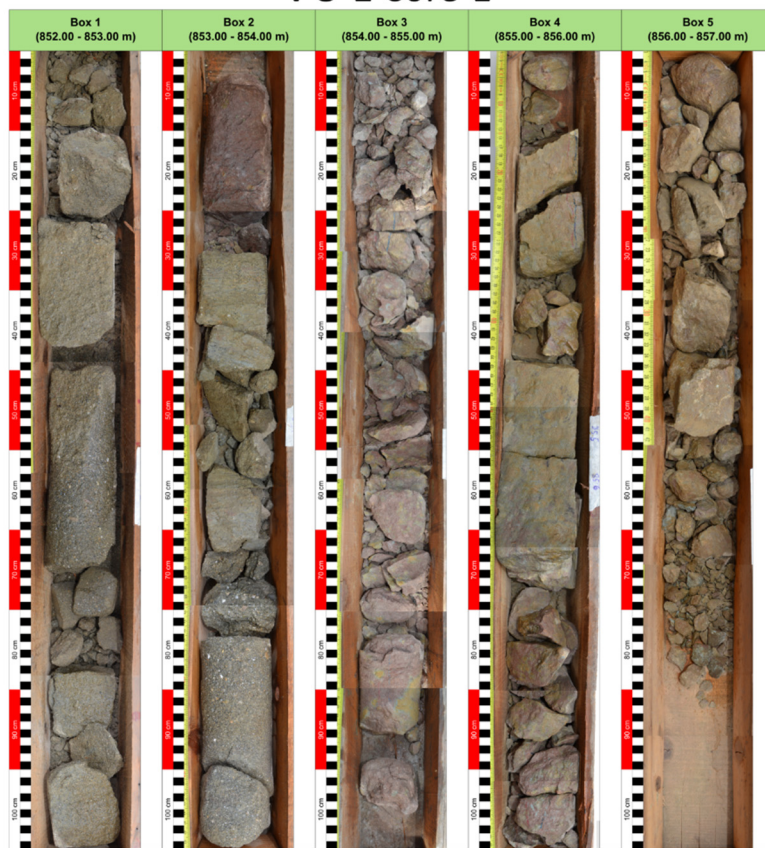

## PO-2 Core-2

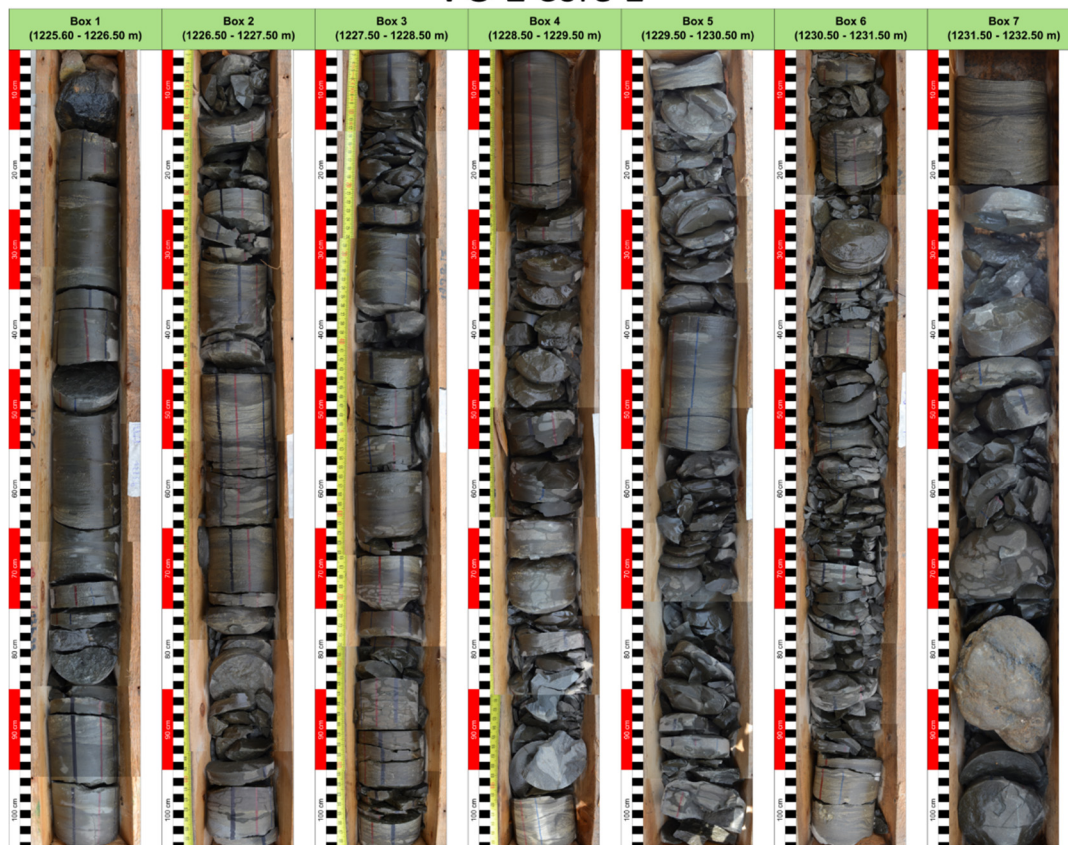

Figure S4. Core photographs from PO-1 well (#C-1 and #C-2).



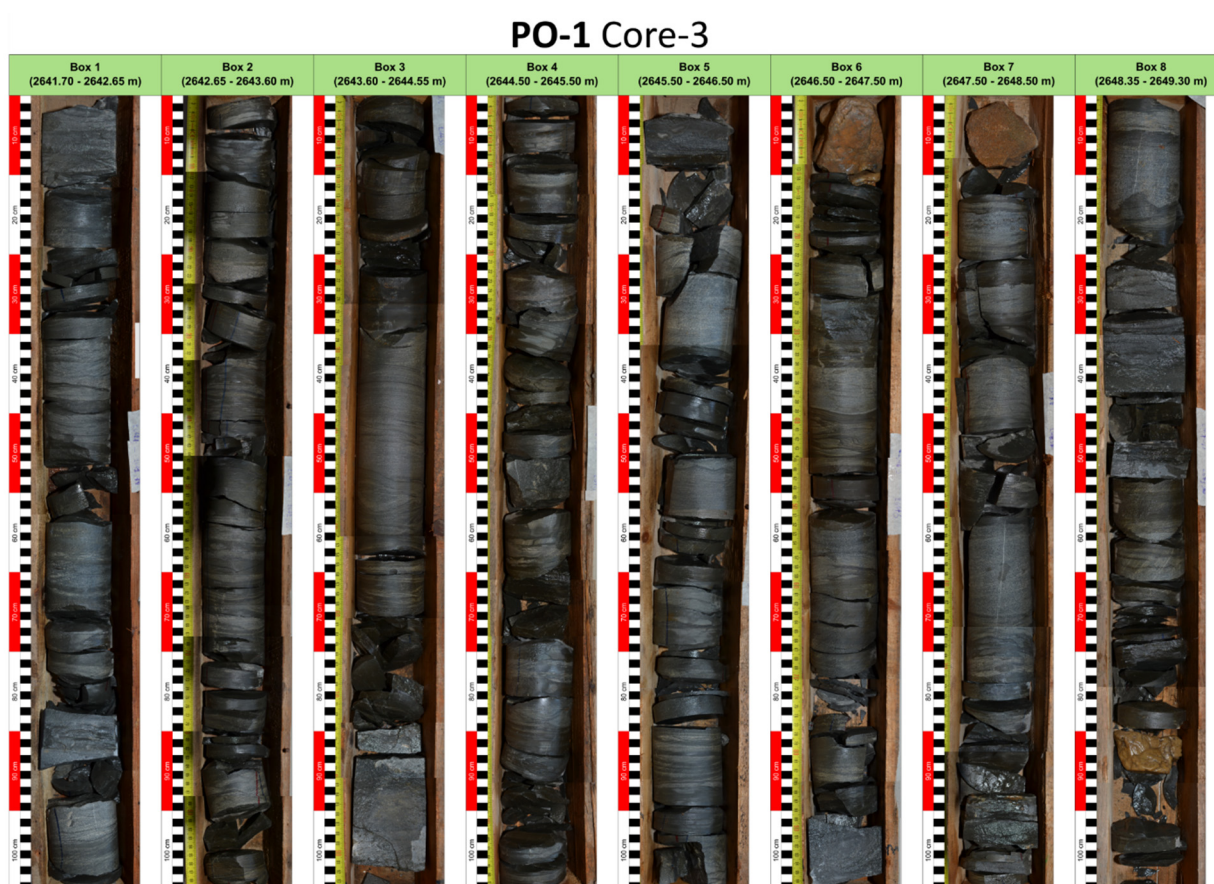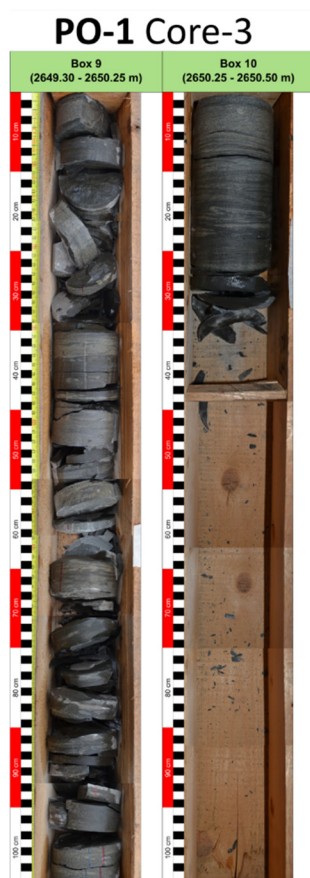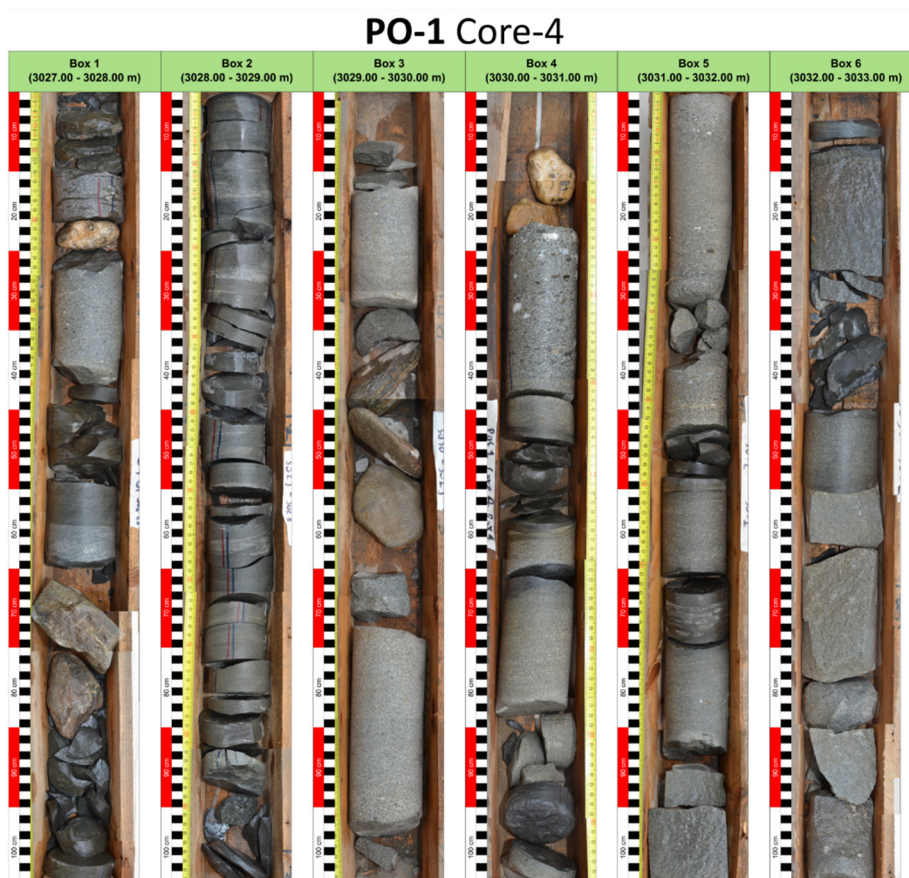

Figure S5. Core photographs from PO-1 well (#C-3 and #C-4).



## PO-1 Core-5

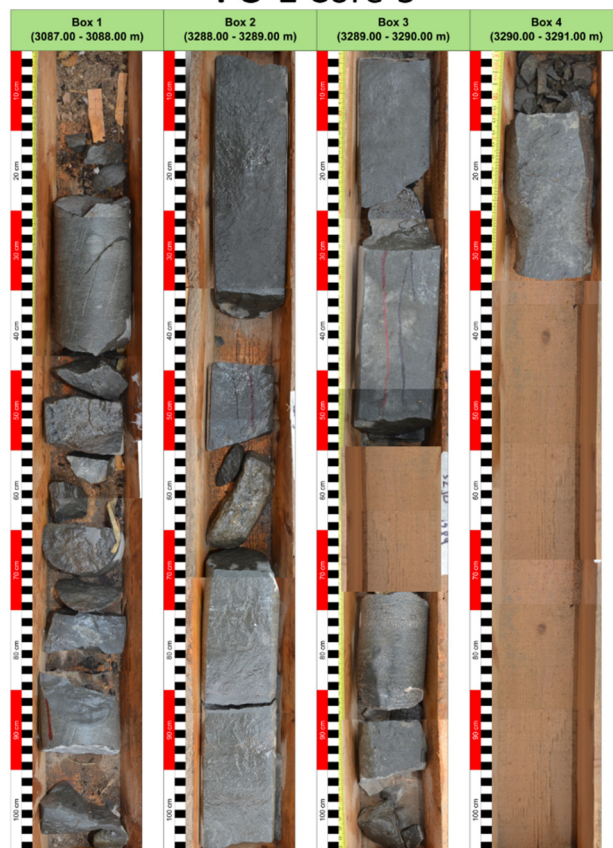

## PO-1 Core-6

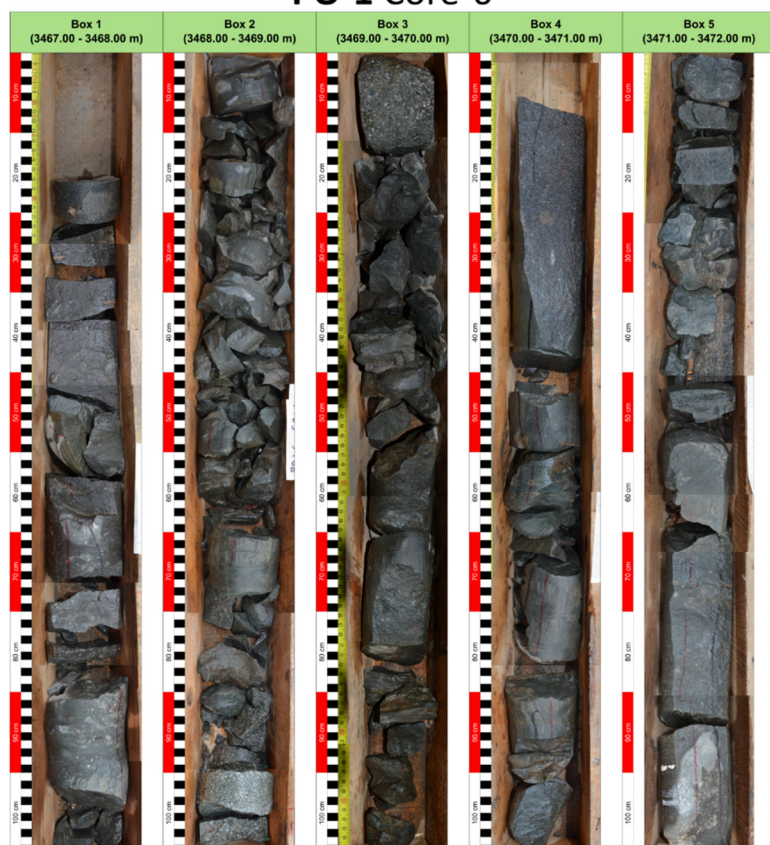

## PO-1 Core-7

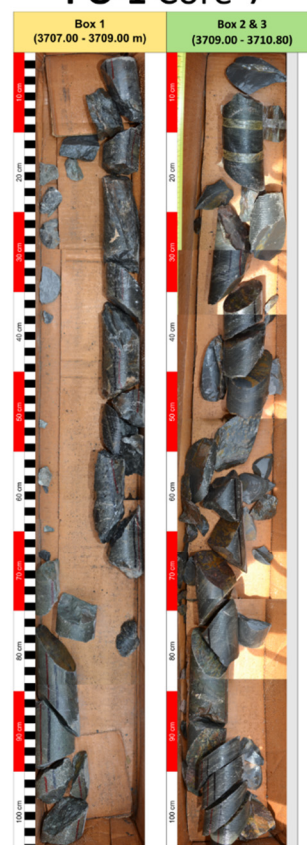

Figure S6. Core photographs from PO-1 well (#C-5, #C-6 and #C7).



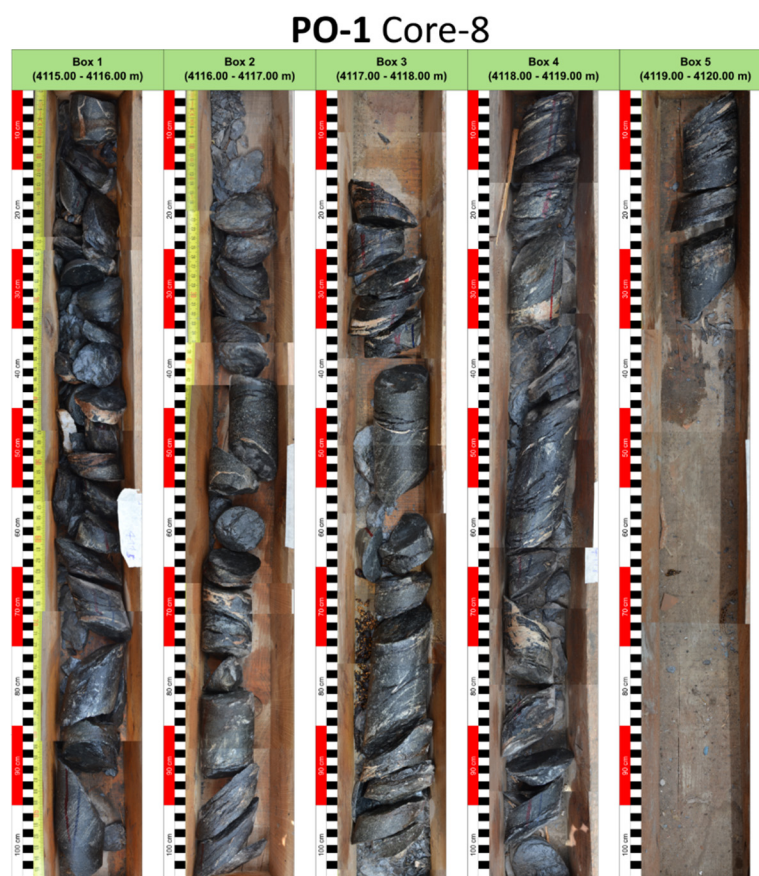

Figure S7. Core photographs from KAS-1 well (#C-8).

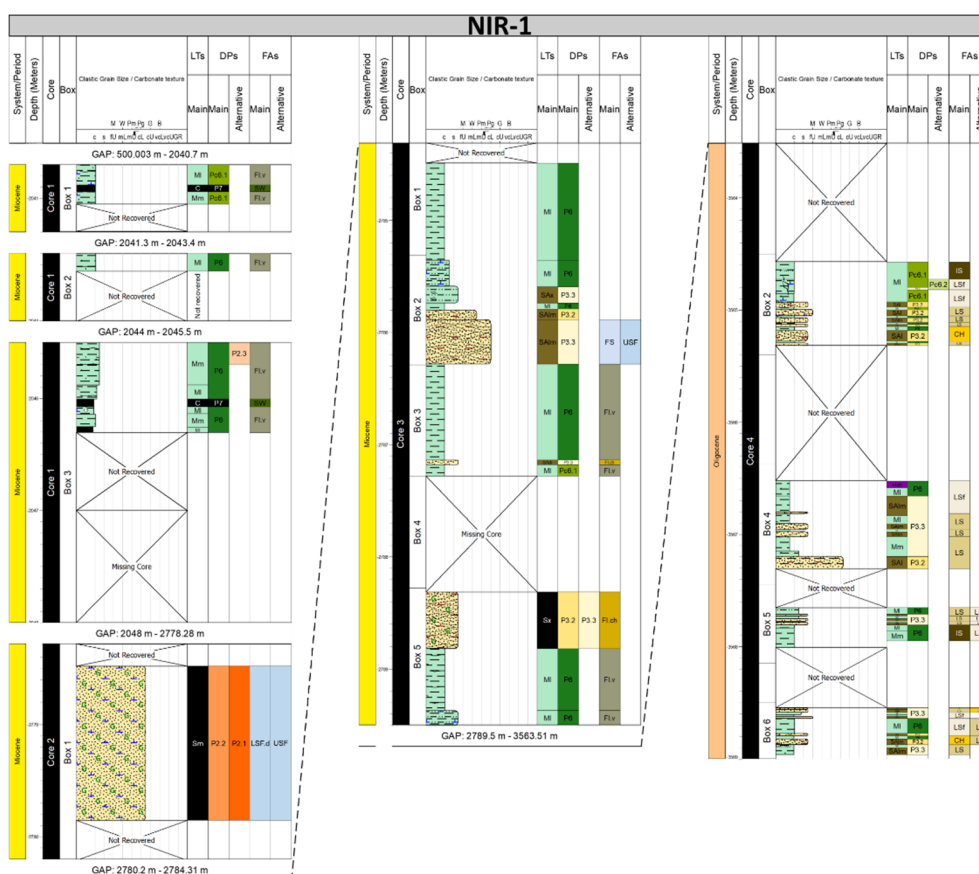

Figure S8. Core descriptions from NIR-1 well.

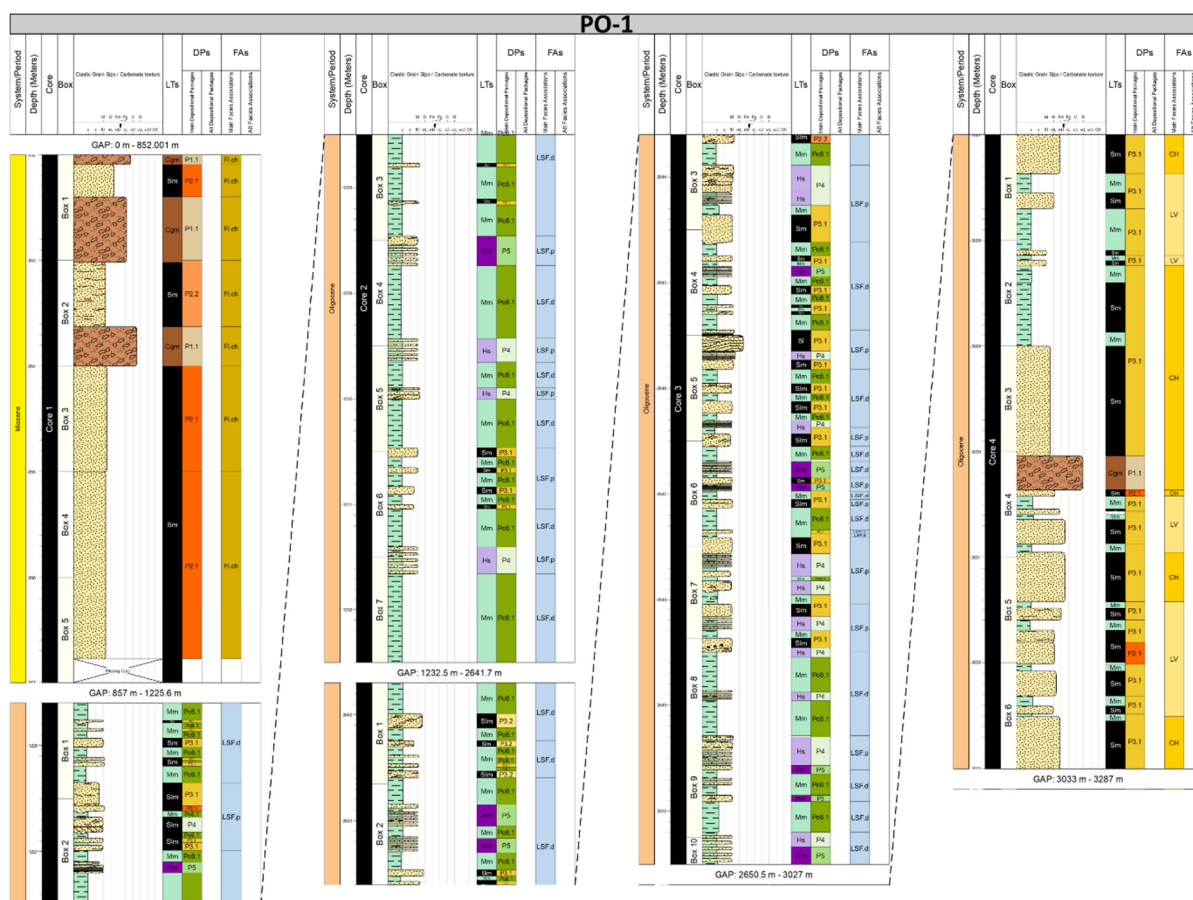

Figure S9. Core descriptions from PO-1 well (#C1-#C4).

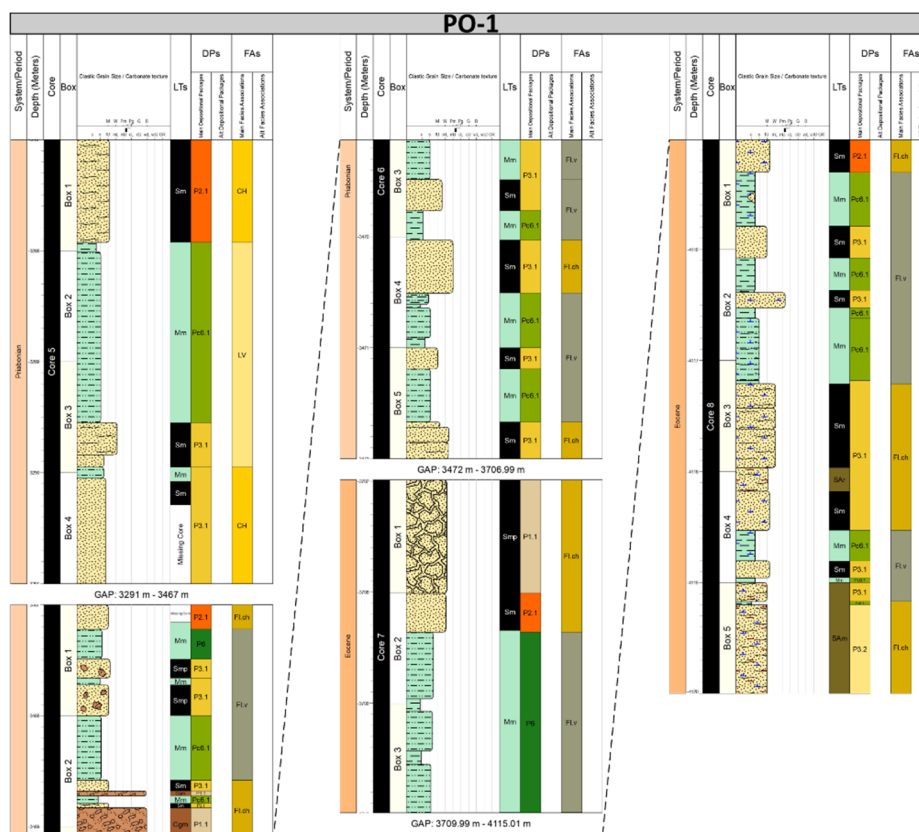

Figure S10. Core descriptions from PO-1 well (#C5-#C8).



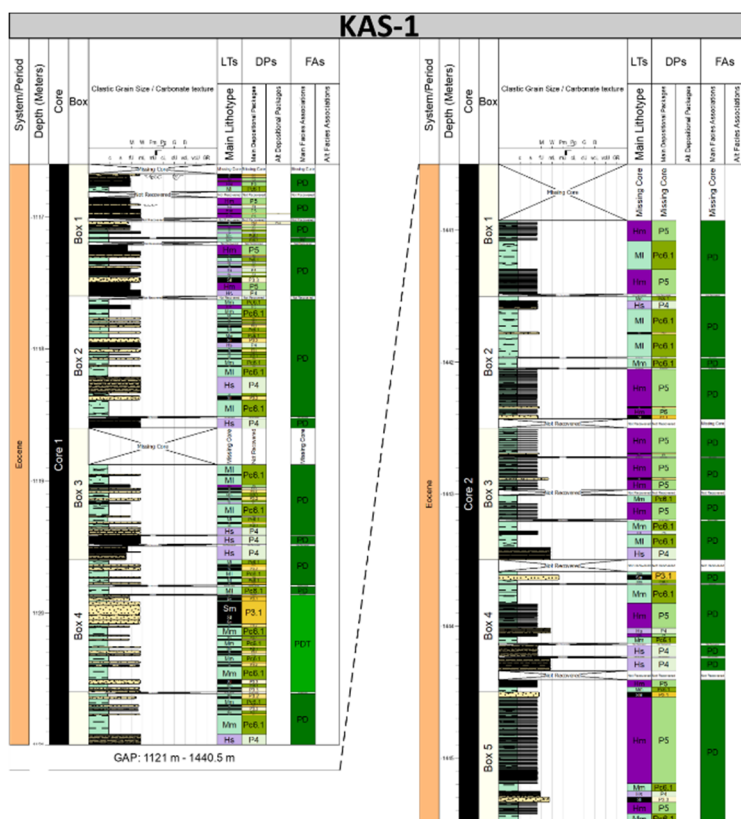

Figure S11. Core descriptions from KAS-1 well.

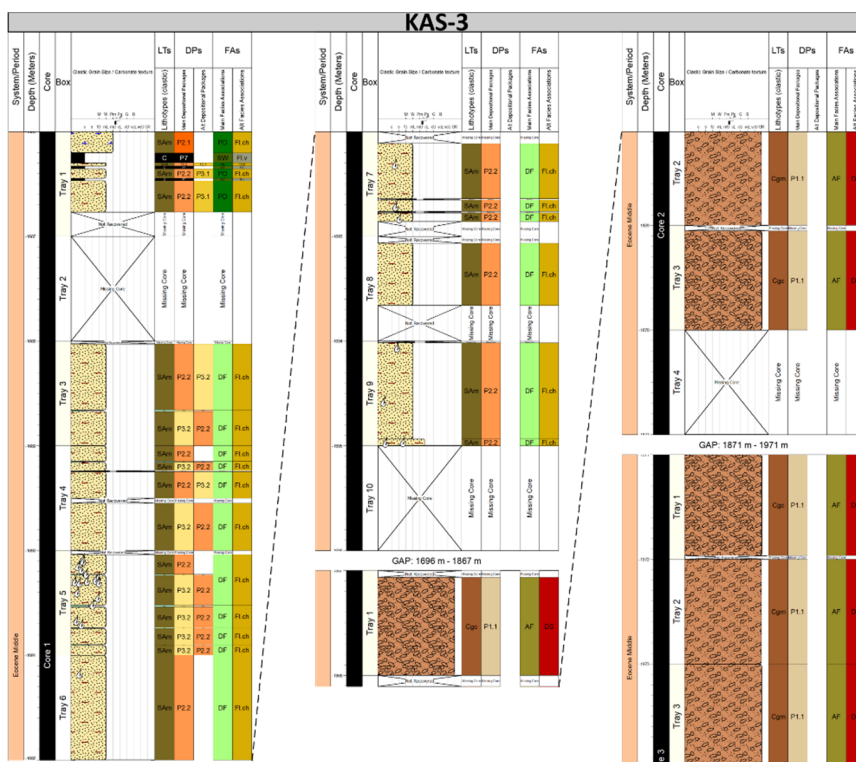

Figure S12. Core descriptions from KAS-3 well.

| LITHOLOGY *                                                                       |                               | DEPOSITIONAL PACKAGES                                                             |                                            | FACIES ASSOCIATIONS                                                                 |                                                 |                                 |                                                                                     |                                                              |                           |
|-----------------------------------------------------------------------------------|-------------------------------|-----------------------------------------------------------------------------------|--------------------------------------------|-------------------------------------------------------------------------------------|-------------------------------------------------|---------------------------------|-------------------------------------------------------------------------------------|--------------------------------------------------------------|---------------------------|
|  | Sandstone                     |  | Siltstone                                  |  | CH Channel-fill undifferentiated                | <div>Deepwater-turbidites</div> |  | FS Foreshore                                                 | <div>Shallow marine</div> |
|  | Fossiliferous Sandstone       |  | Mudrock (incl. Claystone, Shale and Slate) |  | LV Levee                                        |                                 |  | (U/L) SF (Upper/Lower) shoreface<br>(.p:proximal, .d:distal) |                           |
|  | Trough cross bedded Sandstone |  | Sand-dominated heterolithics               |  | LS Lobe sandsheet                               |                                 |  | OTZ Offshore transition zone                                 |                           |
|  | Argillaceous Sandstone        |  | Mud-dominated heterolithics                |  | LSf Lobe sandsheet fringe                       |                                 |  | B/OS Basin/Offshore                                          |                           |
|  | Calcareous Sandstone          |  | Matrix-supported Conglomerate              |  | IS Inter-lobe mudrock sheets                    |                                 |  | SL Slump                                                     |                           |
|  | Glaucinitic Sandstone         |  | Clast-supported Conglomerate               |  | MB Mouthbar                                     | <div>Delta</div>                |  | Fl.ch Floodplain channel                                     | <div>Fluvial</div>        |
|  | Brecciated Sandstone          |  | Coal                                       |  | DF Delta-front                                  |                                 |  | Fl.v Floodplain valley                                       |                           |
| * lithologies might combined (e.g. Calcareous Glaucinitic Sandstone)              |                               |                                                                                   |                                            |  | PDT Prodelta transition zone                    |                                 |  | SW Swamp                                                     |                           |
|                                                                                   |                               |                                                                                   |                                            |  | PD Prodelta                                     |                                 |  | B/L Bay/Lagoon                                               |                           |
|                                                                                   |                               |                                                                                   |                                            |  | AF/SF Aluvian fan sheets / Subaerial fan sheets |                                 |  | DS Debricic sheets                                           |                           |

Figure S13. Core description legend.
